# Supplementary material
Source: PubMed Central journal article supplement (PMC3492986)
Supplement: bph0167-1048-SD1.pdf [file bph0167-1048-SD1.pdf]

## Online Resource 1A

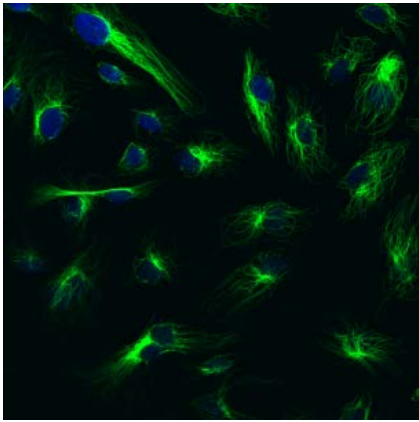

control

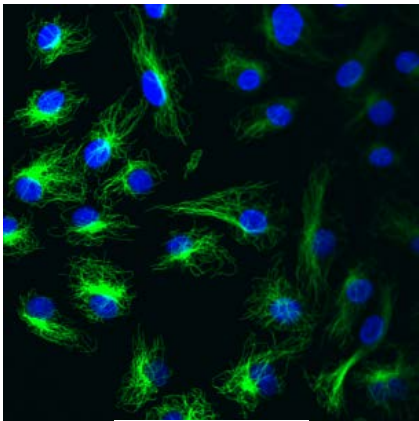

AU816 10nM

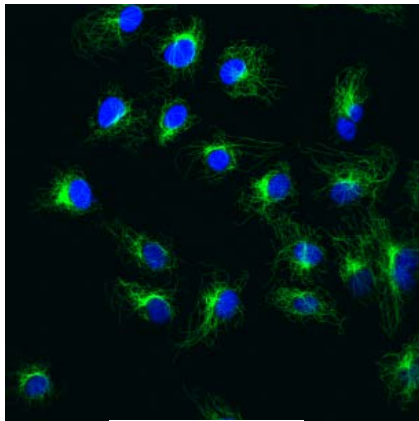

AU816 30nM

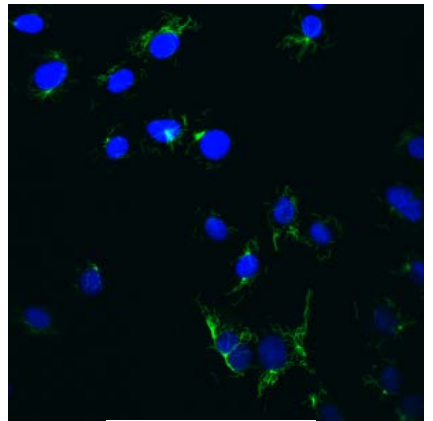

AU816 100nM

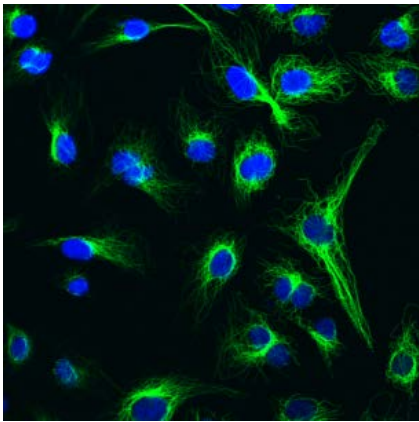

JB337 30nM

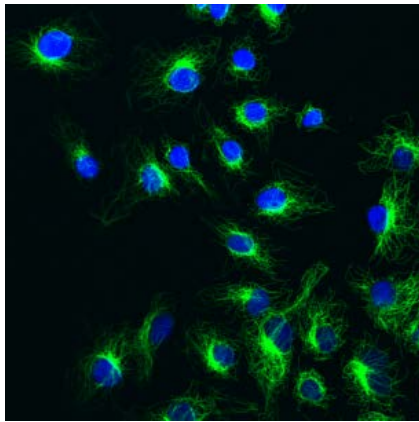

JB337 100nM

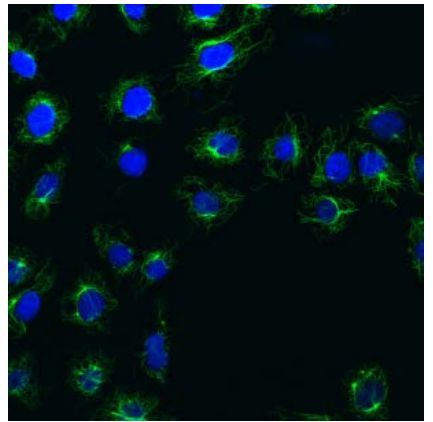

JB337 300nM

Online Resource 1B

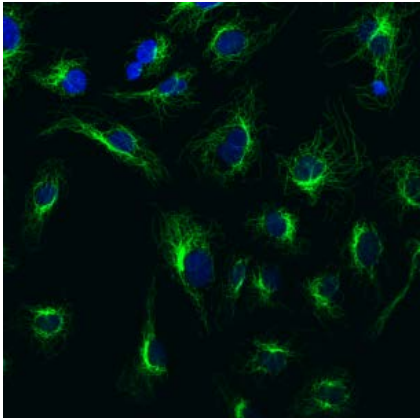

JB375 100nM

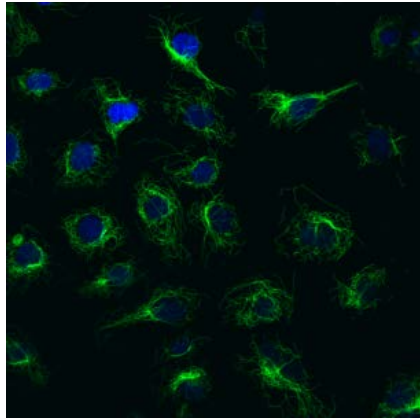

JB375 300nM

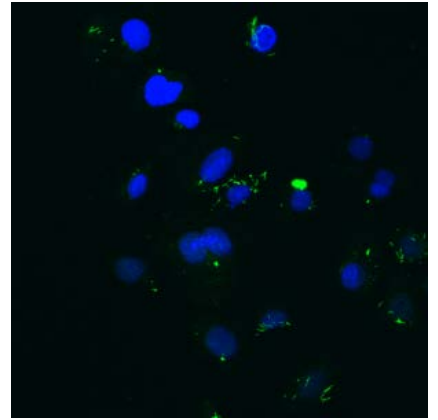

JB375 1µM

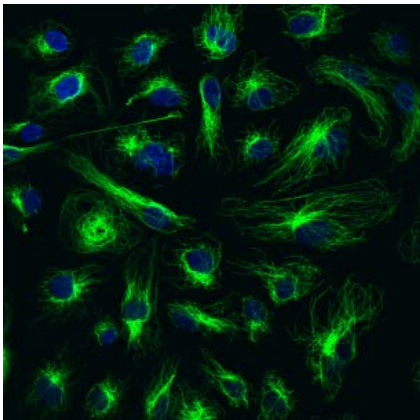

AU954 100nM

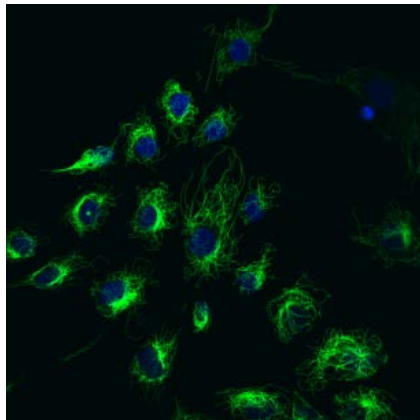

AU954 300nM

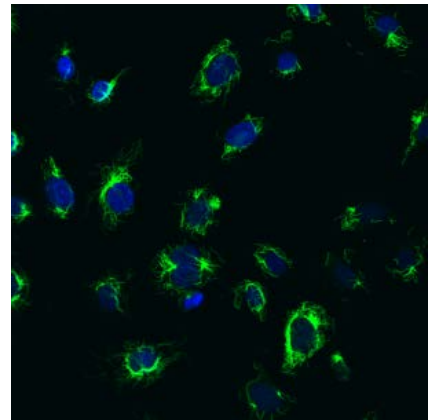

AU954 1µM

Online Resource 1C

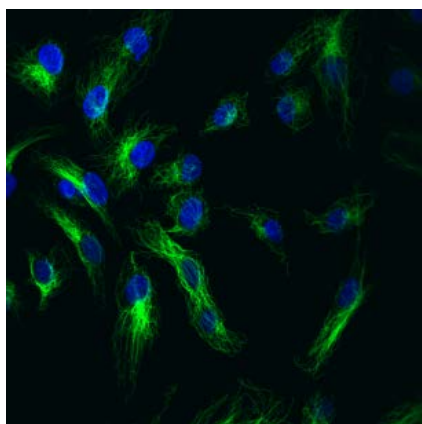

AU825 3 $\mu$ M

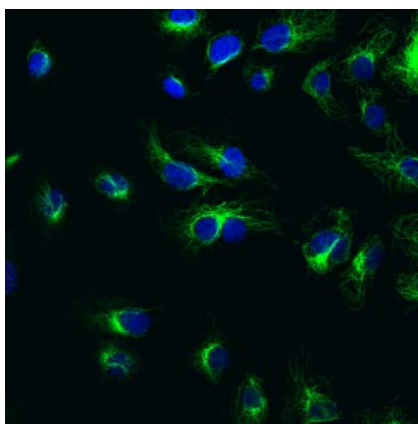

AU825 10 $\mu$ M

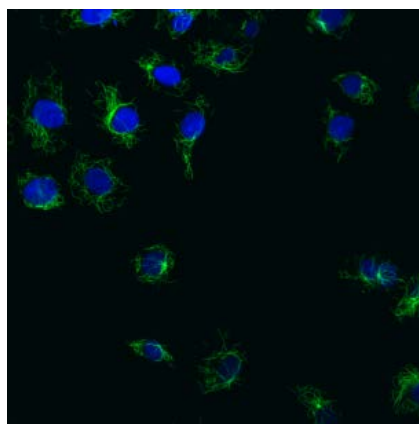

AU825 30 $\mu$ M

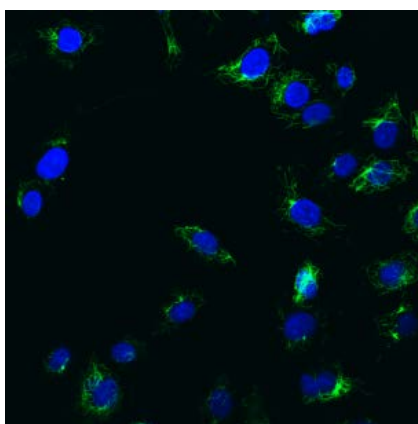

AU815 10 $\mu$ M

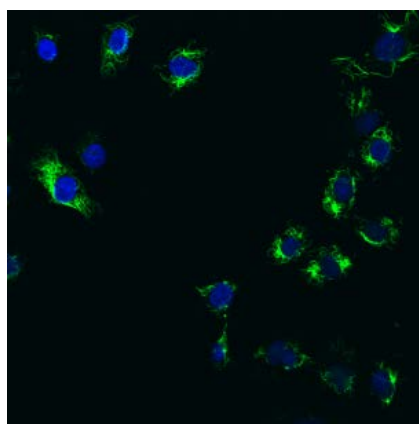

AU815 30 $\mu$ M

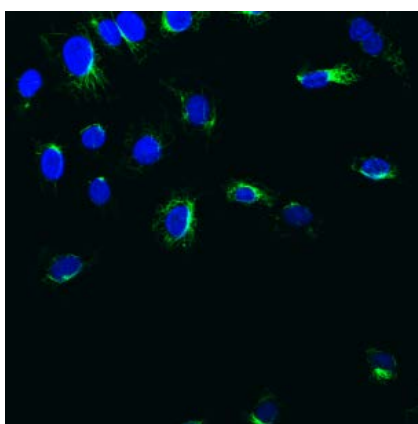

JB338 10 $\mu$ M

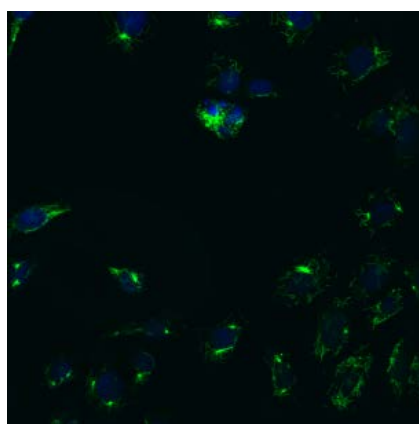

JB338 30 $\mu$ M
