# Supplementary material
Source: PubMed Central journal article supplement (PMC3492986)
Supplement: bph0167-1048-SD2.pdf [file bph0167-1048-SD2.pdf]

## Online Resource 2

|                                                                                 | TubA                     | Prt D                    | AU 816                   | JB 337                | JB 375                   | AU 954                   | AU 815                   | AU825                    | JB 338                   |
|---------------------------------------------------------------------------------|--------------------------|--------------------------|--------------------------|-----------------------|--------------------------|--------------------------|--------------------------|--------------------------|--------------------------|
| Complete microtubule breakdown<br>16hrs                                         | ~ 30 nM                  | ~ 30 nM                  | ≥ 0.1 μM                 | > 0.3 μM              | ~ 1 μM                   | > 1 μM                   | > 30 μM                  | > 30 μM                  | ≥ 30 μM                  |
| Inhibition of proliferation<br>72hrs<br>HMEC-1<br>EC <sub>50</sub><br>(95% -CI) | 1.2 nM<br>(1.0 – 1.3 nM) | 2.3 nM<br>(1.9 – 2.8 nM) | 4.4 nM<br>(3.3 – 5.8 nM) | 14 nM<br>(11 – 16 nM) | 55 nM<br>(45 – 67 nM)    | 60 nM<br>(49 – 73 nM)    | 2.2 μM<br>(0.9 – 5.1 μM) | 1.2 μM<br>(0.9 – 1.5 μM) | 1.5 μM<br>(0.9 – 2.6 μM) |
| G <sub>2</sub> M-arrest<br>48hrs<br>HMEC-1<br>EC <sub>50</sub><br>(95% -CI)     | 1.9 nM<br>(1.7 – 2.2 nM) | 4.1 nM<br>(3.5 – 4.6 nM) | 25 nM<br>(22 – 28 nM)    | 54 nM<br>(48 – 61 nM) | 0.2 μM<br>(0.2 – 0.3 μM) | 0.3 μM<br>(0.3 – 0.4 μM) | 25 μM<br>(15 – 44 μM)    | 7.6 μM<br>(4.4 – 13 μM)  | 7.0 μM<br>(0.5 – 10 μM)  |
| Nuclear Fragmentation<br>48hrs<br>HMEC<br>EC <sub>50</sub><br>(95% -CI)         | 2.4 nM<br>(1.9 – 3.1 nM) | 2.9 nM<br>(2.3 – 3.8 nM) | 22 nM<br>(17 – 28 nM)    | 63 nM<br>(58 – 69 nM) | 0.3 μM<br>(0.2 – 0.3 μM) | 0.3 μM<br>(0.3 – 0.4 μM) | 10 μM<br>(8.1 – 13 μM)   | 7 μM<br>(4.9 – 9.7 μM)   | 8 μM<br>(5.9 – 11 μM)    |
| Wound Repair inhibition<br>16hrs<br>HUVECs<br>EC <sub>50</sub><br>(95% - CI)    | 3.4 nM<br>(2.9 – 3.9 nM) | 5.3 nM<br>(4.3 – 6.5 nM) | 11 nM<br>(9.9 – 13 nM)   | 26 nM<br>(19 – 35 nM) | 0.2 μM<br>(0.2 – 0.3 μM) | 0.3 μM<br>(0.2 – 0.3 μM) | 4.2 μM<br>(3.3 – 5.4 μM) | 3.0 μM<br>(2.6 – 3.6 μM) | 5.9 μM<br>(5.0 – 6.9 μM) |

Where appropriate EC<sub>50</sub> values are expressed as best fit value and 95% Confidence Interval (CI).
