# Supplementary material
Source: PubMed Central journal article supplement (PMC3492986)
Supplement: bph0167-1048-SD4.pdf [file bph0167-1048-SD4.pdf]

## Online Resource 4

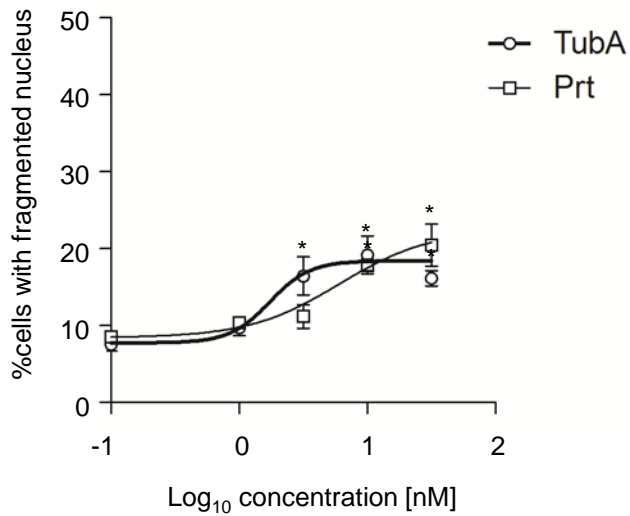

Nuclear fragmentation in HUVECs in the same setting as for migration.  
Data are mean + SEM of three independent experiments, \*  $p < 0.05$  vs. control
