# Supplementary material
Source: PubMed Central journal article supplement (PMC3492986)

### Online Resource 3

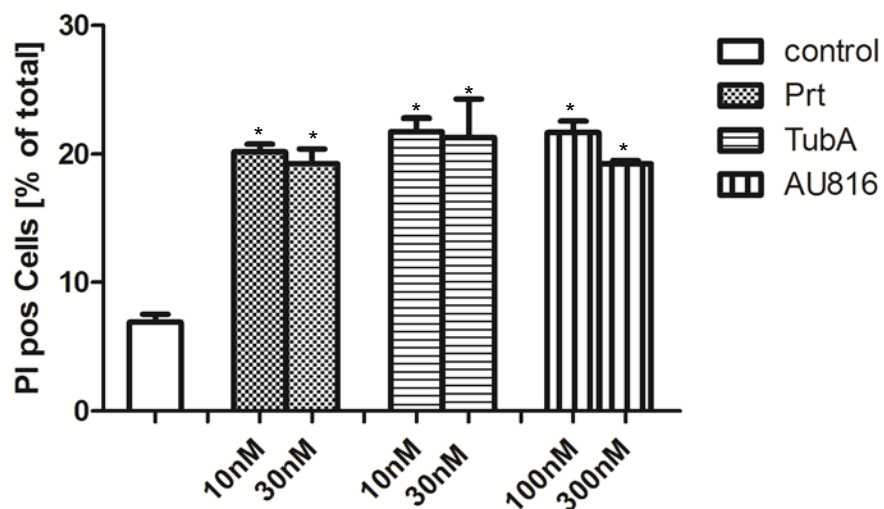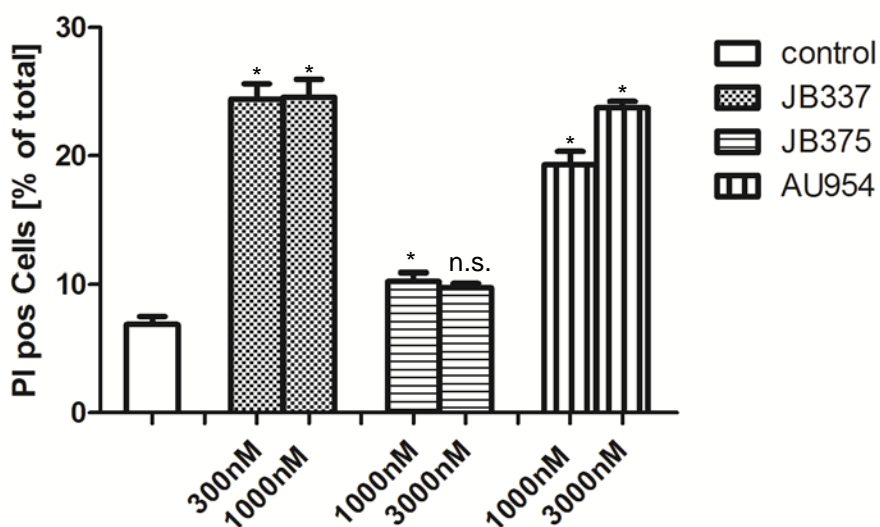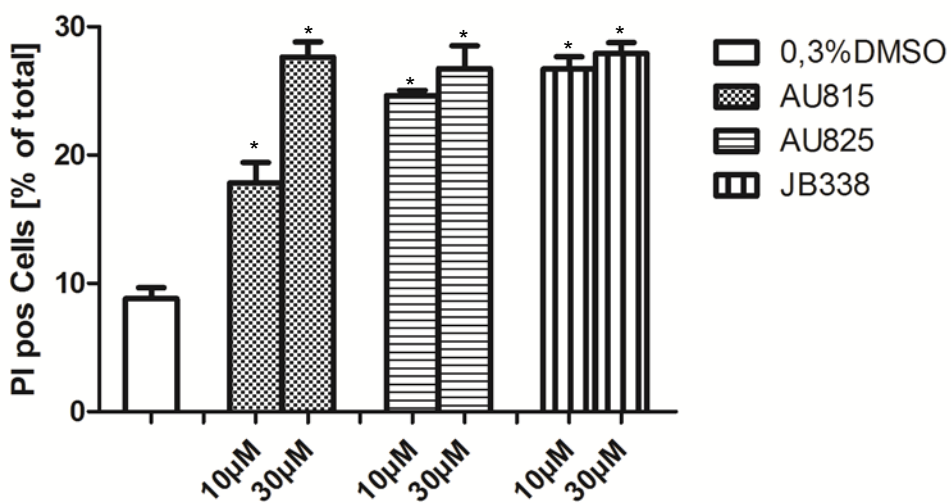

Data are mean + SEM of three independent experiments, \* p < 0.05 vs. control

Supplement: bph0167-1048-SD3.pdf [file bph0167-1048-SD3.pdf]

# Online Resource 5

A

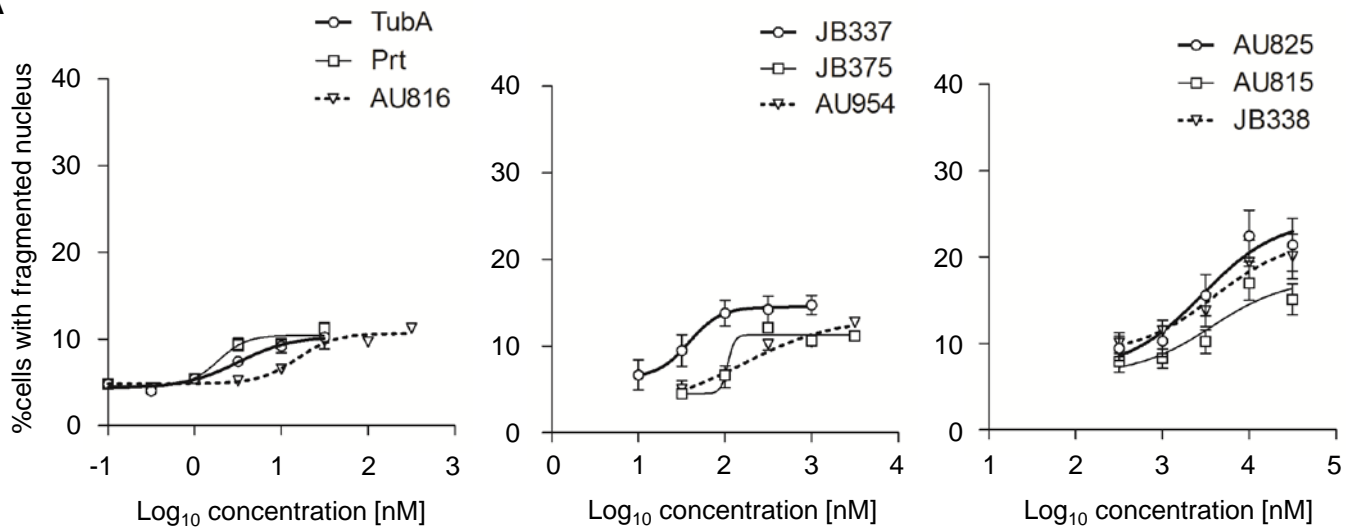

B

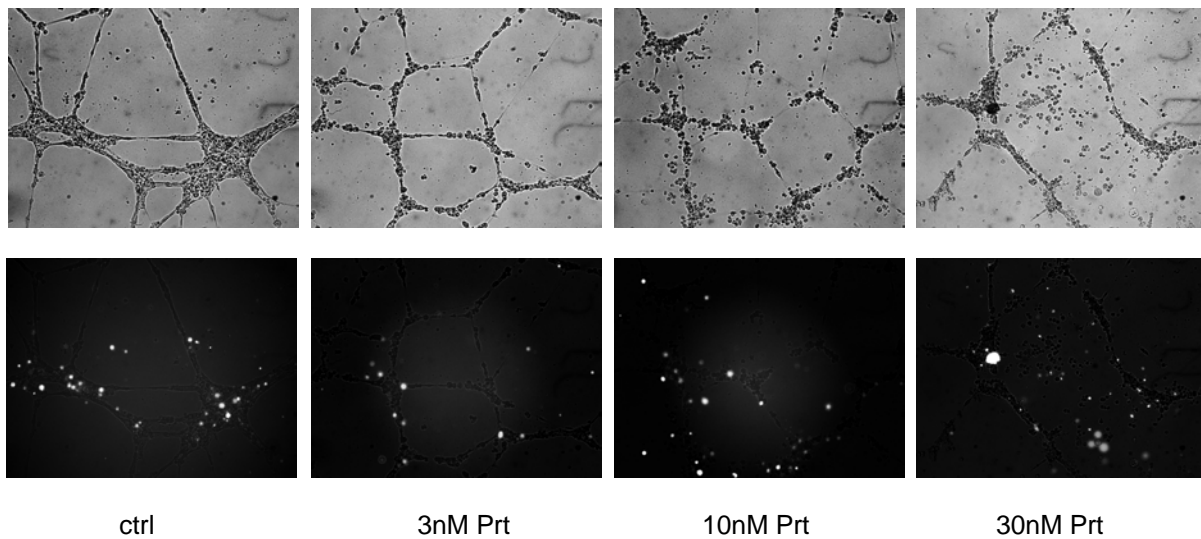

Supplement: bph0167-1048-SD5.pdf [file bph0167-1048-SD5.pdf]

## Online Resource 6

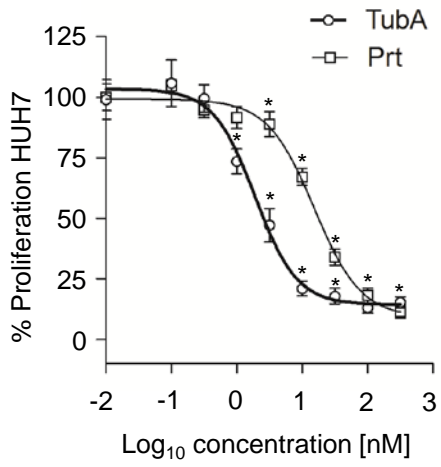

Data are mean + SEM of three independent experiments, \*  $p < 0.05$  vs. control

Supplement: bph0167-1048-SD6.pdf [file bph0167-1048-SD6.pdf]
